# Supplementary material for: Quantitative Analysis and Human Health Risk Assessment of Heavy Metals in Paddy Plants Collected from Perak, Malaysia
Source: Int J Environ Res Public Health. 2022 Jan 10;19(2):731. doi: 10.3390/ijerph19020731 (PMC8775821; doi:10.3390/ijerph19020731)
Supplement: Supplementary file 1 [file ijerph-19-00731-s001.zip › ijerph-1386793-supplementary.pdf]

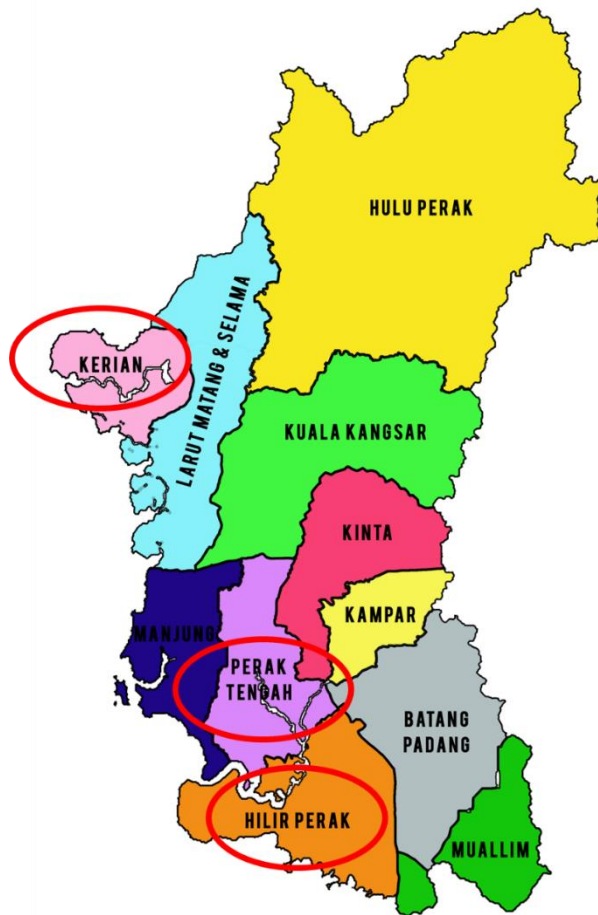

**Figure S1.** Three study areas located in Perak, Malaysia.

**Table S1.** Information used for calculation of average daily dose (ADD) for Malaysian adult and children based on previous study [20].

| <b>Parameters</b>                   | <b>Malaysian Adult</b> | <b>Malaysian Children</b> |
|-------------------------------------|------------------------|---------------------------|
| Ingestion Rate (IR, kg/day)         | 0.6                    | 0.198                     |
| Exposure Frequency (EF, days/years) | 365                    | 365                       |
| Exposure Duration (ED, years)       | 74                     | 74                        |
| Body Weight (BW, kg)                | 62.65                  | 19.5                      |
